# Supplementary material
Source: PubMed Central journal article supplement (PMC6496037)
Supplement: AAC.00040-19-s0001.pdf [file AAC.00040-19-s0001.pdf]

1 SUPPLEMENTAL MATERIAL -

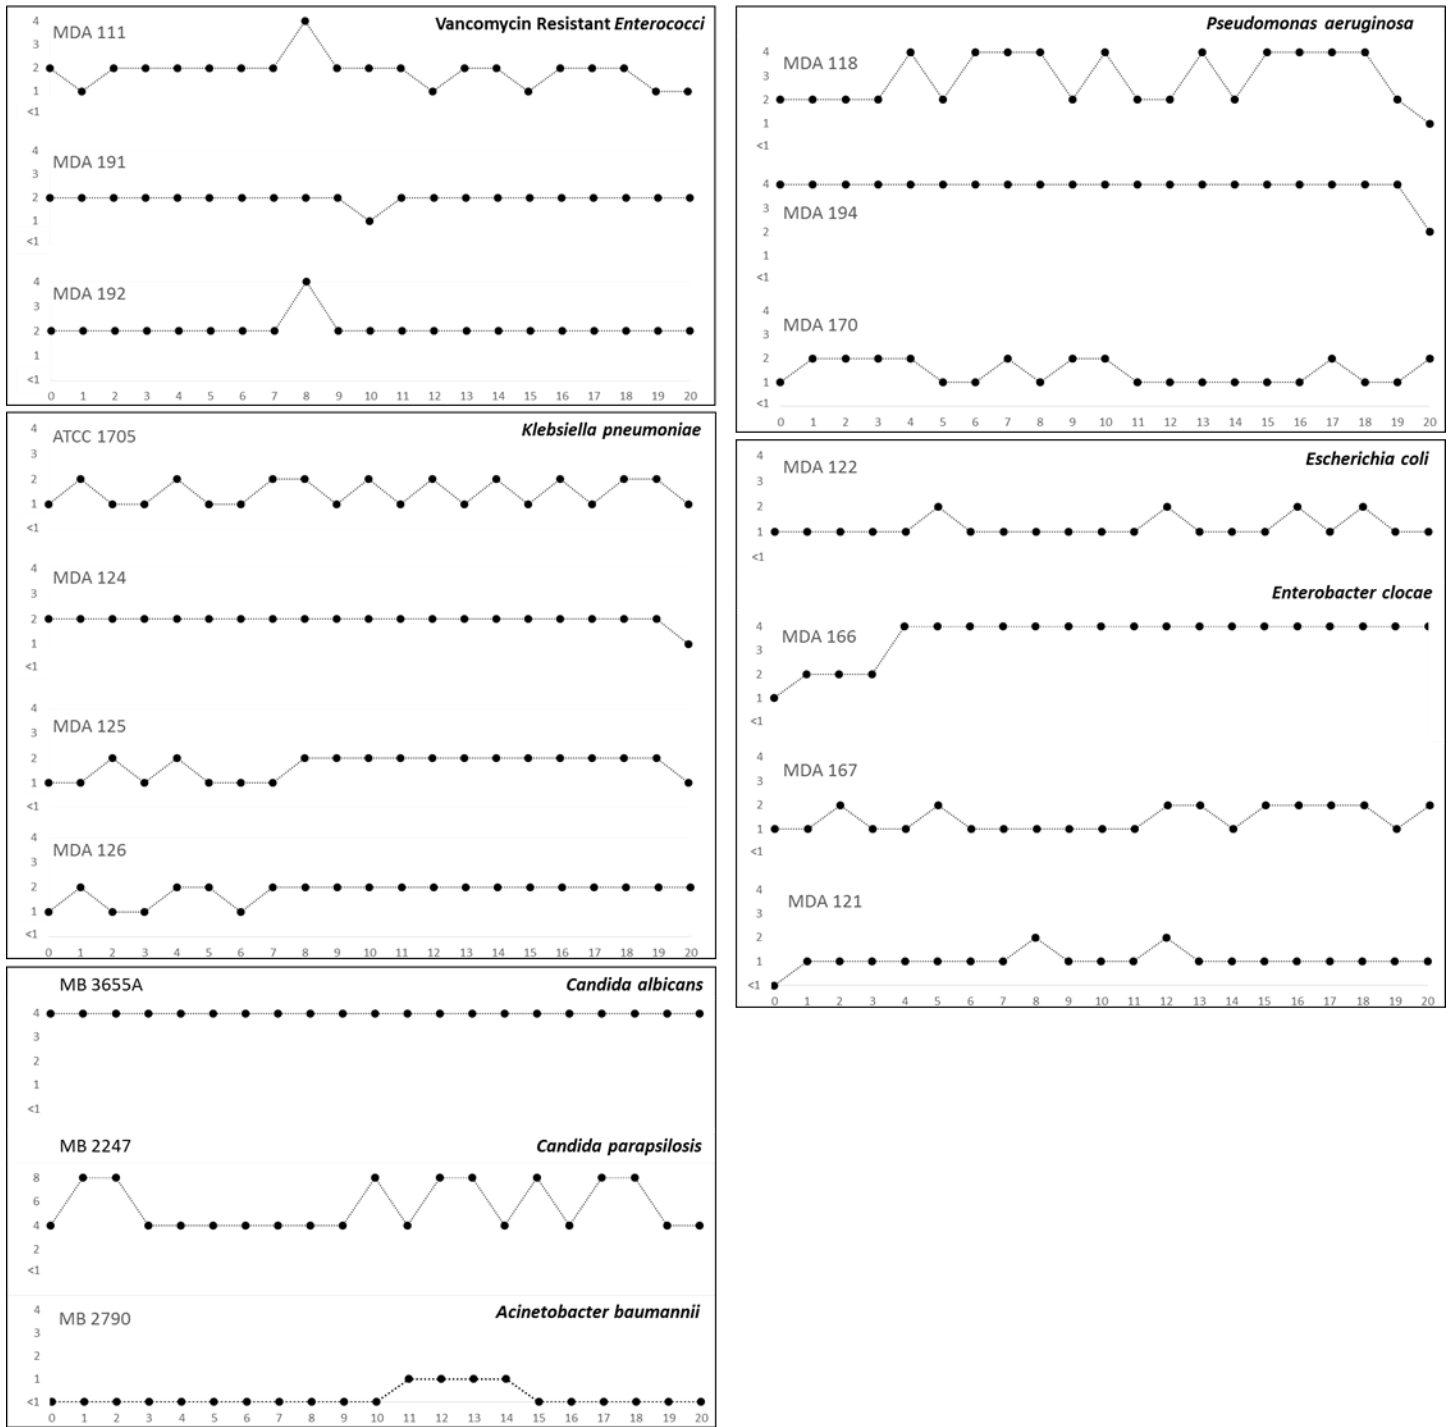

2

3 **Supplemental Material Figure S1 – Median MIC for MIN, RIF, and CHX in each sub-inhibitory passage for low**

4 **susceptibility organisms** - The median measured MIC values for MIN, RIF, and CHX in each passage are the circles in  
 5 each plot. Dotted lines have been added to assist in visualizing the trend in MIC values. A vertical MIC trend (continually  
 6 increasing MIC trending toward antimicrobial agent ineffectiveness) would be indicative of induced resistance for a  
 7 particular organism. Conversely, a horizontal MIC trend would be indicative of the absence of induced resistance for a

8 particular organism. Low susceptibility organisms tested included the following susceptibility patterns: vancomycin  
9 resistant *enterococci* (VRE MDA 111, 191, 192); carbapenem resistant *enterobacteriaceae* including *Klebsiella pneumoniae*  
10 (ATCC 1705, MDA 124, 125, 126), *Escherichia coli* (MDA 122), *Enterobacter cloacae* (MDA 166, 167, 121); Multi-drug  
11 resistant *Pseudomonas aeruginosa* (MDA 118, 194, 170); Other organisms *Acinetobacter baumannii* (MB2790), *Candida*  
12 *albicans* (MB3655A), and *Candida parapsilosis* (MB 2247). The x-axis for each plot is the passage number and y-axis is  
13 measured median MIC ( $\mu\text{g/mL}$ ).

14

15



28

29

30 **Table S1 - Susceptibility of Test Organisms**

31 Organisms were tested for susceptibilities of commonly used antibiotics as reported by University of Texas MD Anderson Clinical Microbiological Laboratory. All  
32 definitions are per CLSI guidelines for susceptibility testing (1, 2). All testing is conducted by the CLIA certified UT MDACC Clinical Microbiology Laboratory using  
33 a Biomerieux Vitek II system or using E-test strips for determining antibiotic profiles for each organism. Determination of which antibiotics were tested for which  
34 organism was determined by standard operating procedures in the clinical microbiology laboratory, some antibiotics are not available or appropriate to be  
35 tested for specific organisms.

36 Abbreviations and definitions are as follows: R – Resistant to antimicrobial based on interpretation of MIC/Etest; I – Intermediate to antimicrobial based on  
37 interpretation of MIC/Etest; S – Sensitive to antimicrobial based on interpretation of MIC/Etest; MRSA – methicillin resistant Staphylococcus aureus; VRE –  
38 vancomycin resistant enterococci; ECS – Extended Spectrum cephalosporin, resistant to at least one of the extended spectrum cephalosporin (cefepime,  
39 cefotazime, ceftazidime, ceftriaxone); CRE – carbapenem resistant enterobacteriaceae, resistant to at least one carbapenem (ertapenem, imipenem,  
40 meropenem, doripenem); MDR – multidrug resistant, must be intermediate or resistant to at least 1 drug in 3 of the 6 classes (extended spectrum  
41 cephalosporin, fluoroquinolones, aminoglycosides, CRE, piperacillin/tazobactam, ampicillin/sulbactam).

42

| <b>Enterococcus</b>       |            |            |            | <b>Klebsiella pneumoniae</b> |               |               |               |
|---------------------------|------------|------------|------------|------------------------------|---------------|---------------|---------------|
| ID                        | MDA 111    | MDA 191    | MDA 192    | ID                           | MDA 124       | MDA 125       | MDA 126       |
| Species                   | E. faecium | E. faecium | E. faecium | Species                      | K. pneumoniae | K. pneumoniae | K. pneumoniae |
| Year                      | 2015       | 2017       | 2017       | Year                         | 2014          | 2014          | 2013          |
| Source                    | Blood      | Blood      | Blood      | Source                       | Blood         | Blood         | Blood         |
| Category                  | VRE        | VRE        | VRE        | Category                     | ESC, CRE, MDR | ESC, CRE, MDR | ESC, CRE, MDR |
| Beta lactamase            | negative   | n/a        | n/a        | Amikacin                     | R             | I             | S             |
| Ampicillin                | R          | S          | R          | Amoxicillin/Clavulanate      |               |               |               |
| Daptomycin                | S          | S          | S          | Ampicillin                   | R             | R             | R             |
| Gentamicin 500            | R          | n/a        | n/a        | Amp/Sulbactam                | R             | R             | R             |
| Levofloxacin              | R          | n/a        | n/a        | Aztreonam                    | R             | R             | R             |
| Linezolid                 | S          | I          | S          | Cefepime                     | I             | R             | R             |
| Nitrofurantoin            | I          | n/a        | n/a        | Cefotaxime                   | R             | R             | R             |
| Streptomycin              | R          | n/a        | n/a        | Cefpodoxime                  | R             | R             | R             |
| Tetracycline              | R          | R          | R          | Ceftazidime                  | n/a           | n/a           | n/a           |
| Vancomycin                | R          | R          | R          | Ceftazidime/Avibactam        | n/a           | n/a           | n/a           |
| Quinupristin/Dalfopristin | n/a        | R          | I          | Ceftriaxone                  | R             | R             | R             |
|                           |            |            |            | Cephalothin                  | R             | R             | R             |
|                           |            |            |            | Ciprofloxacin                | R             | R             | R             |
|                           |            |            |            | Colistin-E                   | NO INTERP     | NO INTERP     | NO INTERP     |
|                           |            |            |            | Ertapenem                    | n/a           | R             | R             |
|                           |            |            |            | Gentamicin                   | S             | R             | R             |
|                           |            |            |            | Imipenem                     | R             | R             | R             |
|                           |            |            |            | Levofloxacin                 | R             | R             | R             |
|                           |            |            |            | Meropenem                    | R             | R             | R             |
|                           |            |            |            | Moxifloxacin                 | R             | R             | R             |
|                           |            |            |            | Nitrofurantoin               | R             | R             | R             |
|                           |            |            |            | Pip/Tazo                     | R             | R             | R             |
|                           |            |            |            | Tigecycline                  | S             | I             | I             |
|                           |            |            |            | Tobramycin                   | R             | R             | S             |
|                           |            |            |            | Sulfa/Trimeth                | R             | R             | R             |
|                           |            |            |            | Carbapenamase                | POSITIVE      | POSITIVE      | POSITIVE      |

| <b>Escherichia coli</b> |               |               |               | <b>Enterobacter spp.</b> |            |            |            |
|-------------------------|---------------|---------------|---------------|--------------------------|------------|------------|------------|
| ID                      | MDA 122       | MDA 164       | MDA 165       | ID                       | MDA 121    | MDA 166    | MDA 167    |
| Species                 | E. coli       | E. coli       | E. coli       | Species                  | Eb. Clocae | Eb. Clocae | Eb. Clocae |
| Year                    | 2015          | 2011          | 2011          | Year                     | 2015       | 2009       | 2011       |
| Source                  | Blood         | Blood         | Blood         | Source                   | Blood      | Blood      | Blood      |
| Category                | ESC, CRE, MDR | ESC, CRE, MDR | ESC, CRE, MDR | Category                 | ESC        | ESC, MDR   | ESC        |
| Amikacin                | R             | S             | I             | Amikacin                 | S          | S          | n/a        |
| Ampicillin              | R             | R             | R             | Ampicillin               | n/a        | R          | n/a        |
| Amp/Sulbactam           | R             | R             | R             | Amp/Sulbactam            | n/a        | R          | n/a        |
| Aztreonam               | R             | R             | S             | Aztreonam                | R          | I          | R          |
| Cefepime                | I             | R             | R             | Cefepime                 | S          | S          | S          |
| Cefotaxime              | R             | R             | S             | Cefotaxime               | R          | R          | R          |
| Cefpodoxime             | R             | n/a           | n/a           | Cefpodoxime              | R          | n/a        | n/a        |
| Ceftazidime             | R             | R             | I             | Ceftazidime              | R          | R          | R          |
| Ceftriaxone             | R             | R             | R             | Ceftriaxone              | R          | R          | R          |
| Cephalothin             | R             | n/a           | n/a           | Cephalothin              | R          | n/a        | n/a        |
| Ciprofloxacin           | R             | R             | n/a           | Ciprofloxacin            | S          | S          | S          |
| Ertapenem               | R             | n/a           | R             | Ertapenem                | I          | n/a        | NO INTERP  |
| Gentamicin              | R             | S             | S             | Gentamicin               | S          | S          | S          |
| Imipenem                | R             | R             | NO INTERP     | Imipenem                 | S          | No INTERP  | NO INTERP  |
| Levofloxacin            | R             | R             | R             | Levofloxacin             | S          | S          | S          |
| Meropenem               | R             | R             | NO INTERP     | Meropenem                | S          | No INTERP  | NO INTERP  |
| Moxifloxacin            | R             | R             | n/a           | Moxifloxacin             | S          | n/a        | S          |
| Nitrofurantoin          | n/a           | S             | S             | Nitrofurantoin           | I          | S          | S          |
| Pip/Tazo                | R             | R             | R             | Pip/Tazo                 | n/a        | R          | R          |
| Tigecycline             | I             | S             | S             | Tigecycline              | S          | S          | n/a        |
| Tobramycin              | R             | S             | R             | Tobramycin               | S          | S          | S          |
| Sulfa/Trimeth           | R             | R             | R             | Sulfa/Trimeth            | S          | S          | S          |
| Carbapenamase           | POSITIVE      | POSITIVE      | n/a           | Carbapenamase            | POSITIVE   | n/a        | POSITIVE   |

44

45

| <b>Pseudomonas aeruginosa</b> |                |                |                | <b>Acinetobacter spp</b> |              |               |              |
|-------------------------------|----------------|----------------|----------------|--------------------------|--------------|---------------|--------------|
| ID                            | MDA 118        | MDA 170        | MDA 194        | ID                       | MB2875       | MB2790        | MB2761       |
| Species                       | Ps. aeruginosa | Ps. aeruginosa | Ps. aeruginosa | Species                  | An. Ursingii | An. Baumannii | An baumannii |
| Year                          | 2003           | 2016           | 2017           | Year                     | 2016         | 2016          | 2016         |
| Source                        | Catheter site  | Blood          | Blood          | Source                   | Blood        | Blood         | Blood        |
| Category                      | MDR            | MDR            | MDR            | Category                 | Suseptible   | Suseptible    | Suseptible   |
| Amikacin                      | S              | I              | I              | Amikacin                 | S            | S             | S            |
| Aztreonam                     | R              | R              | R              | Cefepime                 | S            | S             | S            |
| Cefepime                      | I              | R              | I              | Ciprofloxacin            | S            | S             | S            |
| Ceftazidime                   | I              | R              | S              | Colistin                 | n/a          | n/a           | S            |
| Ceftizoxime                   | R              | n/a            | n/a            | Imipenem                 | S            | S             | S            |
| Ceftriaxone                   | R              | n/a            | n/a            | Meropenem                | n/a          | n/a           | S            |
| Ciprofloxacin                 | R              | R              | R              | Minocycline              | n/a          | n/a           | S            |
| Gentamicin                    | S              | n/a            | n/a            | Pip/Tazo                 | S            | S             | n/a          |
| Imipenem                      | R              | R              | R              | Tobramycin               | S            | S             | S            |
| Levofloxacin                  | R              | n/a            | n/a            | Trimethoprim/Sulfa       | S            | S             | S            |
| Meropenem                     | R              | R              | R              |                          |              |               |              |
| Norfloxacin                   | R              | n/a            | n/a            |                          |              |               |              |
| Piperacillin                  | S              | n/a            | n/a            |                          |              |               |              |
| Pip/Tazo                      | S              | n/a            | R              |                          |              |               |              |
| Ticar/Clav                    | R              | n/a            | n/a            |                          |              |               |              |
| Tobramycin                    | S              | S              | R              |                          |              |               |              |
| Ceftazidime/Avibactam         | n/a            | S              | n/a            |                          |              |               |              |
| Ceftolozane/Tazobactam        | n/a            | R              | S              |                          |              |               |              |

46

47

48

49 REFERENCES

50 1. (CLSI) CaLSI. 2015. M07-A10 - Methods for Dilution Antimicrobial Suseptibilty Tested for Bacteria that Grow Aerobically; Approved Standard - Tenth  
51 Edition, vol 35, Wayne, PA.  
52 2. (CLSI) CaLSI. 2015. M100S - Performance Standards for antimicrobial suseptibility testing, 26 ed, Wayne, PA.

53
